# Supplementary material for: Characterization and Clinical Relevance of Endometrial CAFs: Correlation between Post-Surgery Event and Resistance to Drugs
Source: MDPI journal article supplement (doi:10.3390/ijms24076449), 2023-03-29
Supplement: s1 [file s1]

## Suppliematry Figure S1

### On Cover-slip & On-plate Plan of Matrigel On-Top Hybrid Co-culture

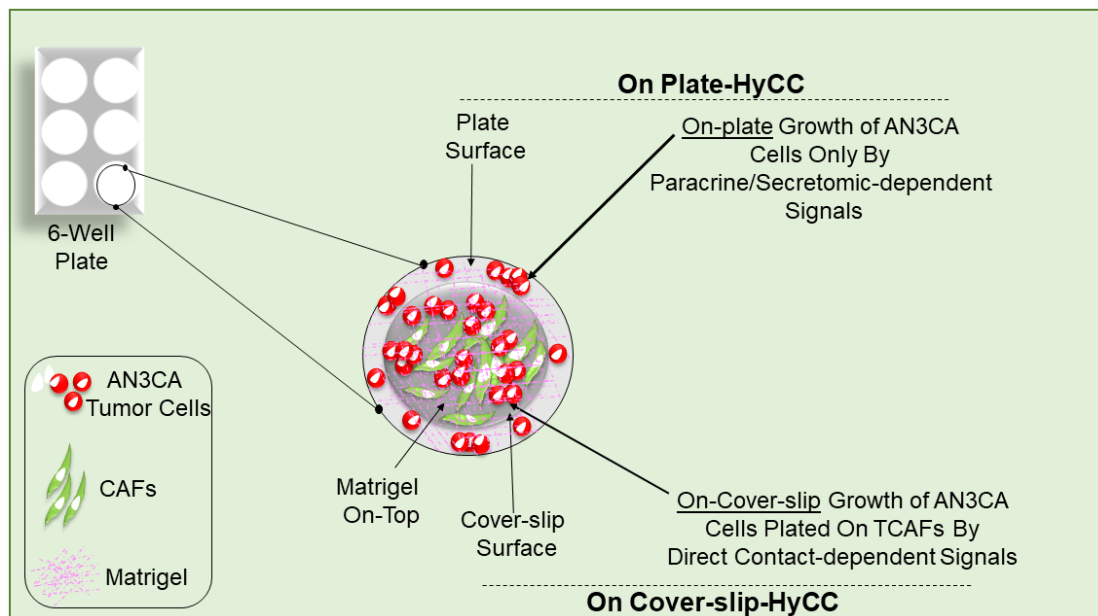

**Figure S1: Diagrammatic representation of formats of "On-C-slip" HyCC and "On-Plate" HyCC are shown.** "On-C-slip" HyCC comprised coverslips pre-coated with DiO-stained CAFs on which Dil-stained AN3CA cells were plated. While "On-Plate" HyCC comprised no pre-coated coverslips, only Dil-stained AN3CA cells were plated on the plate.

#### Additional Supplementary Statement:

We received both tumor and tumor-adjacent normal samples from the resected tissue within an hour of the surgery. Depending on the stage, grade, size of the tumor mass, and oncologists' decision, we received the tissue for the grossing (in the pathology department). We received tissues once pathologists retained tissues for the MMR profiling/HRD testing/ future pathology tests as required by the oncologists.

From the pathology department, we received the tissues as follows:

1. Only tumor
2. Tumor and normal endometrium as the tumor-adjacent normal
3. Tumor and Fallopian tube as the tumor-adjacent normal
4. Tumor and normal myometrium as the tumor-adjacent normal
